# Supplementary material
Source: PubMed Central journal article supplement (PMC6145418)
Supplement: icy073_supp.pdf [file icy073_supp.pdf]

**Supplement Table 1.** Change in mitochondrial respiratory function, ROS, oxidative damage, and antioxidant levels between peak lactation and 1-week post-partum in the rat. Results of t-tests are given. Data adapted from Hyatt et al. (2018a, b).

| Variable; Organ                                                                         | Peak Lactation  | Post-Lactation  | F    | df   | P               |
|-----------------------------------------------------------------------------------------|-----------------|-----------------|------|------|-----------------|
| <b><u>Respiratory control ratio (state 3 / state 4 respiration)</u></b>                 |                 |                 |      |      |                 |
| <i>Liver</i>                                                                            |                 |                 |      |      |                 |
| RCR complex I substrates                                                                | 5.13 $\pm$ 0.20 | 4.94 $\pm$ 0.14 | 0.75 | 11   | 0.47            |
| RCR complex II substrates                                                               | 5.73 $\pm$ 0.18 | 6.21 $\pm$ 0.13 | 2.05 | 13   | 0.06            |
| <i>Muscle</i>                                                                           |                 |                 |      |      |                 |
| RCR complex I substrates                                                                | 8.89 $\pm$ 0.29 | 8.70 $\pm$ 0.51 | 0.32 | 14   | 0.75            |
| RCR complex II substrates                                                               | 3.29 $\pm$ 0.05 | 3.39 $\pm$ 0.10 | 0.90 | 13   | 0.38            |
| <b><u>ROS Production (H<sub>2</sub>O<sub>2</sub>/min/citrate synthase activity)</u></b> |                 |                 |      |      |                 |
| Liver                                                                                   | 264.0 $\pm$ 12  | 205. $\pm$ 17   | 2.74 | 11   | <b>0.02</b>     |
| Muscle                                                                                  | 16.7 $\pm$ 2.9  | 11.2 $\pm$ 2.3  | 1.53 | 10   | 0.16            |
| <b><u>Oxidative damage (arbitrary units)</u></b>                                        |                 |                 |      |      |                 |
| <i>Liver</i>                                                                            |                 |                 |      |      |                 |
| Lipid peroxidation (4HNE)                                                               | 0.99 $\pm$ 0.02 | 1.01 $\pm$ 0.03 | 0.46 | 14   | 0.64            |
| Protein carbonyls                                                                       | 1.07 $\pm$ 0.04 | 1.06 $\pm$ 0.04 | 0.32 | 13   | 0.75            |
| <i>Muscle</i>                                                                           |                 |                 |      |      |                 |
| Lipid peroxidation (4HNE)                                                               | 1.09 $\pm$ 0.03 | 0.97 $\pm$ 0.01 | 3.42 | 7.1* | <b>&lt;0.01</b> |
| Protein carbonyls                                                                       | 1.08 $\pm$ 0.05 | 0.95 $\pm$ 0.03 | 2.14 | 13   | <b>0.05</b>     |
| <b><u>Antioxidants (arbitrary units)</u></b>                                            |                 |                 |      |      |                 |
| <i>Liver</i>                                                                            |                 |                 |      |      |                 |
| SOD1                                                                                    | 0.89 $\pm$ 0.04 | 1.12 $\pm$ 0.05 | 3.47 | 13   | <b>&lt;0.01</b> |
| SOD2                                                                                    | 0.85 $\pm$ 0.03 | 1.42 $\pm$ 0.09 | 6.28 | 8.2* | <b>&lt;0.01</b> |
| Catalase                                                                                | 1.06 $\pm$ 0.04 | 1.20 $\pm$ 0.05 | 2.42 | 13   | <b>0.03</b>     |
| GPX                                                                                     | 0.84 $\pm$ 0.05 | 1.04 $\pm$ 0.06 | 2.49 | 13   | <b>0.03</b>     |
| <i>Muscle</i>                                                                           |                 |                 |      |      |                 |
| SOD1                                                                                    | 1.05 $\pm$ 0.06 | 0.93 $\pm$ 0.06 | 1.44 | 12   | 0.18            |
| SOD2                                                                                    | 1.46 $\pm$ 0.11 | 1.13 $\pm$ 0.09 | 2.30 | 9    | <b>0.05</b>     |
| Catalase                                                                                | 1.06 $\pm$ 0.07 | 0.99 $\pm$ 0.04 | 0.93 | 13   | 0.37            |
| GPX                                                                                     | 1.11 $\pm$ 0.10 | 1.01 $\pm$ 0.05 | 1.01 | 12   | 0.33            |

\*variances unequal between groups, Satterwaite approximation applied.
